# Supplementary material
Source: PubMed Central journal article supplement (PMC6374931)
Supplement: 10-1160-th13-11-0971-supp.pdf [file 10-1160-th13-11-0971-supp.pdf]

# **Supporting Information to Sommer et al. “Comparative field study: impact of laboratory assay variability on the assessment of recombinant factor IX Fc fusion protein (rFIXFc) activity” (Thromb Haemost 2014; 112.5)**

## **Participating Laboratories**

The following laboratories participated in this study: Addenbrooke's Hospital, Cambridge, UK; Basingstoke & North Hampshire Hospital, Basingstoke, UK; Beth Israel Deaconess Medical Center, Boston, MA; Blood Center of Wisconsin, Milwaukee, WI; Boston Medical Center, Boston, MA; Children's Hospital of Michigan, Detroit, MI; CHU Sainte-Justine, Montréal, Canada; Cleveland Clinic, Cleveland, OH; Esoterix Colorado Coagulation, Englewood, CO; Hamilton Health Sciences Laboratory Reference Centre, Ontario, Canada; Harborview Medical Center, University of Washington, Seattle, WA; Hemostasis Reference Laboratory, Hamilton, Canada; Hospital of the University of Pennsylvania, Philadelphia, PA; ITxM Diagnostics, Pittsburgh, PA; Louisiana Coagulation Laboratory, Covington, LA; Massachusetts General Hospital, Boston, MA; Medical University of Vienna, Austria; Oxford University Hospital, Oxford, UK; Puget Sound Blood Center, Seattle, WA; Queen's University, Kingston, Canada; Quest Diagnostics Nichols Institute, San Juan Capistrano, CA; St Paul's Hospital, Vancouver, Canada; Tufts Medical Center, Boston, MA; University Medical Center, Utrecht, Netherlands; University Medical Centre St Radboud, Nijmegen, Netherlands; University of Campinas, Campinas, Brazil; University of Colorado Health Sciences Center, Denver, CO; University of Texas Southwestern Medical Center, Dallas, TX; University of Washington Medical Center, Seattle, WA; Vanderbilt University Medical Center, Nashville, TN; Westmead Hospital, Westmead, Australia

**Suppl. Table 1: Instrumentation and One-stage Assay Reagents Used by Participating Laboratories**

| <b>Laboratory</b> | <b>Instrument</b> | <b>aPTT reagent</b> | <b>Calibrator</b>   | <b>Activator type</b> |
|-------------------|-------------------|---------------------|---------------------|-----------------------|
| Lab 1             | Stago Evolution   | Siemens Actin FS    | Siemens             |                       |
| Lab 2             | Siemens CA7000    | Siemens Actin FS    | Stago Unicalibrator |                       |
| Lab 3             | Siemens BCS-XP    | Siemens Actin FS    | Precision BioLogic  | Ellagic acid          |
| Lab 4             | Siemens BCS-XP    | Siemens Actin FSL   | Siemens             |                       |
| Lab 5             | Siemens BCS-XP    | Siemens Actin FSL   | 3rd WHO IS          |                       |
| Labs 6–8          | Siemens BCS-XP    | Siemens Actin FSL   | Siemens             |                       |
| Lab 9             | Stago Evolution   | Roche Cephacreen    | In-house pool       | Polyphenols           |
| Lab 10            | Stago Destiny     | Trinity Auto APTT   | Technoclone         |                       |
| Lab 11            | Trinity MDA-II    | Trinity Auto APTT   | Precision BioLogic  |                       |
| Lab 12            | Siemens BCS-XP    | Trinity Auto APTT   | Siemens             |                       |
| Lab 13            | IL ACL TOP        | IL SynthASil        | Precision BioLogic  |                       |
| Labs 14–15        | IL ACL TOP        | IL SynthASil        | IL HemoSil          |                       |
| Lab 16            | Stago Evolution   | Stago PTT-A         | Stago Unicalibrator | Silica                |
| Lab 17            | Stago Evolution   | Stago PTT-A         | Precision BioLogic  |                       |
| Lab 18            | Stago Evolution   | Stago PTT-A         | In-house pool       |                       |
| Lab 19            | Stago Evolution   | Stago PTT-A         | Stago Unicalibrator |                       |
| Lab 20            | Stago Evolution   | Stago PTT-A         | Technoclone         |                       |
| Lab 21            | IL ACL TOP        | Stago PTT-A         | IL HemoSil          |                       |
| Lab 22            | Siemens BCS-XP    | Stago PTT-A         | Siemens             |                       |

| <b>Laboratory</b> | <b>Instrument</b> | <b>aPTT reagent</b> | <b>Calibrator</b>   | <b>Activator type</b> |
|-------------------|-------------------|---------------------|---------------------|-----------------------|
| Lab 23            | IL ACL TOP        | Pathromtin SL       | IL HemoSil          |                       |
| Lab 24            | Siemens BCS-XP    | IL HemosIL          | Siemens             |                       |
| Lab 25            | Trinity MDA-II    | Tcoag Platelin L    | TCoag               |                       |
| Lab 26            | Trinity MDA 180   | Tcoag Platelin L    | Precision BioLogic  |                       |
| Lab 27            | Stago Evolution   | Stago CK-Prest      | Stago Unicalibrator |                       |
| Lab 28            | Stago Evolution   | Stago CK-Prest      | Precision BioLogic  | Kaolin                |
| Lab 29            | Stago Evolution   | Stago CK-Prest      | Stago Unicalibrator |                       |
| Lab 30            | Stago Evolution   | Stago CK-Prest      | Stago Unicalibrator |                       |

aPTT, activated partial thromboplastin time.

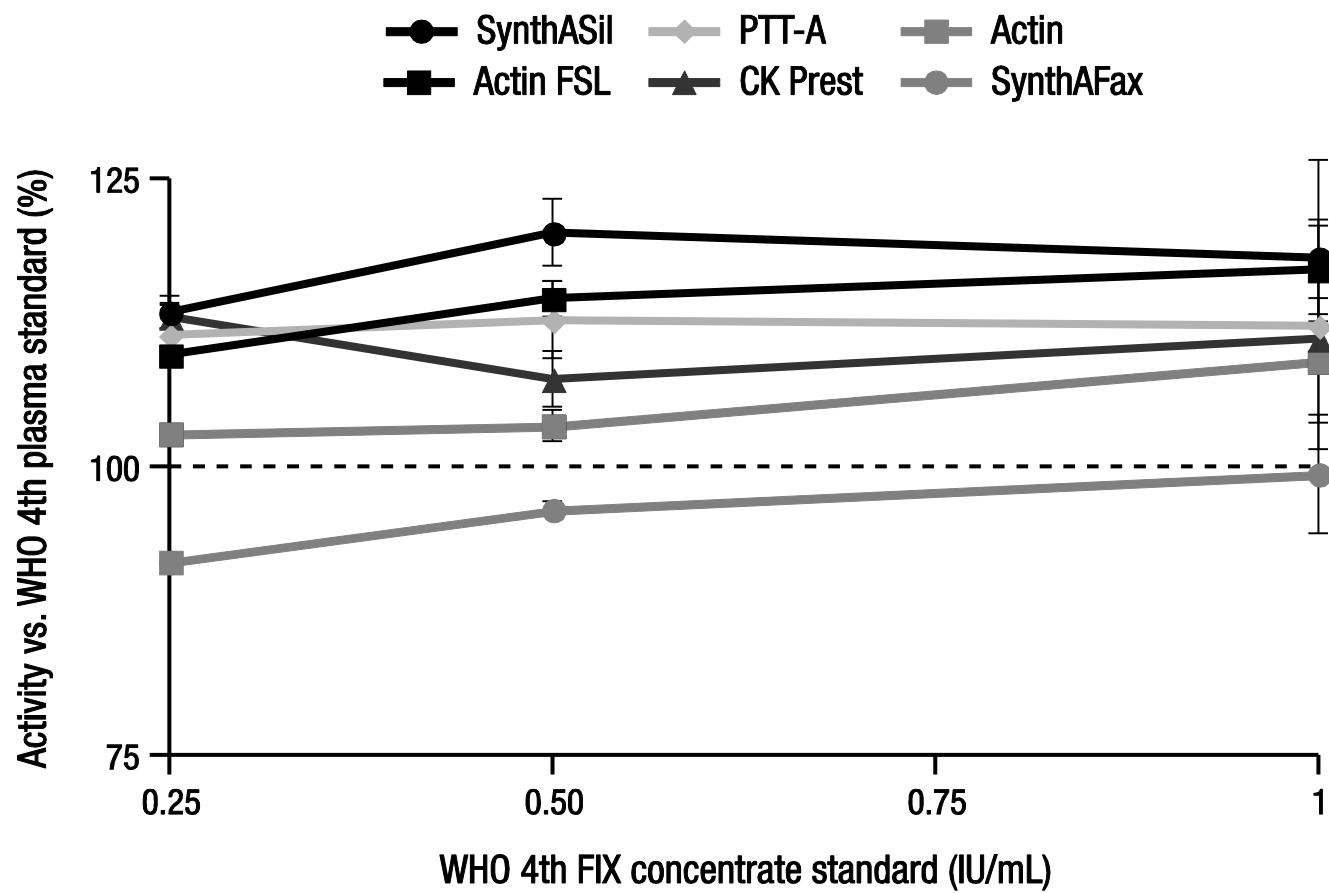

**Suppl. Figure 1:** Comparison of WHO 4th FIX concentrate standard versus WHO 4th FIX plasma standard. WHO, World Health Organization; FIX, factor IX; IU, International Units.
